# Supplementary material for: De novo sequencing and comparative analysis of holy and sweet basil transcriptomes
Source: PubMed Central journal article supplement (PMC4125705; doi:10.1186/1471-2164-15-588), 2014-07-12

**Additional file 1:** Pathway assignment of *O. sanctum* and *O. basilicum*.unigenes based on Kyoto Encyclopedia of Genes and Genomes (KEGG).

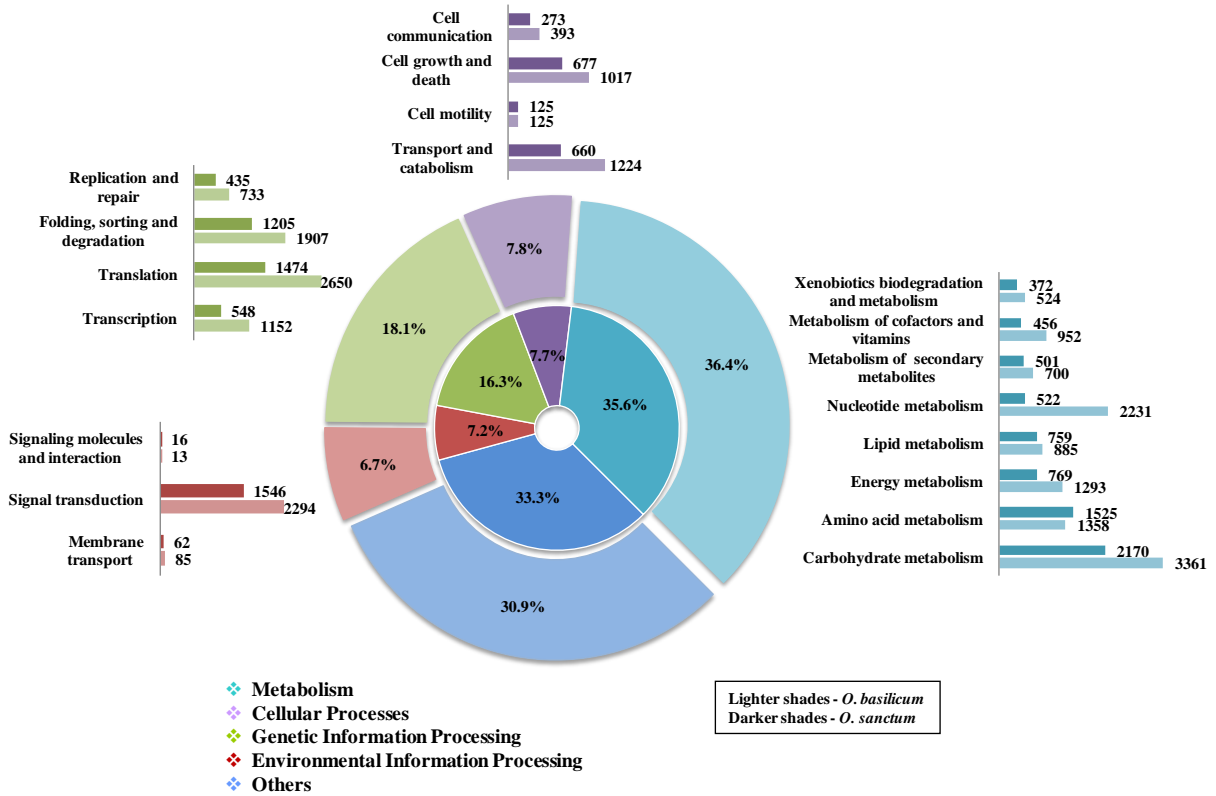

Supplement: 12864_2014_6319_MOESM4_ESM.pdf [file 12864_2014_6319_MOESM4_ESM.pdf]
