# Supplementary material for: De novo sequencing and comparative analysis of holy and sweet basil transcriptomes
Source: PubMed Central journal article supplement (PMC4125705; doi:10.1186/1471-2164-15-588), 2014-07-12
Supplement: 12864_2014_6319_MOESM6_ESM.pdf [file 12864_2014_6319_MOESM6_ESM.pdf]

**Additional file 2:** Somatic chromosome preparations of (a) *O. basilicum* ( $2n=48$ ) and (b) *O. sanctum* ( $2n= 16$ ) on a scale of  $1\mu\text{m}$ .

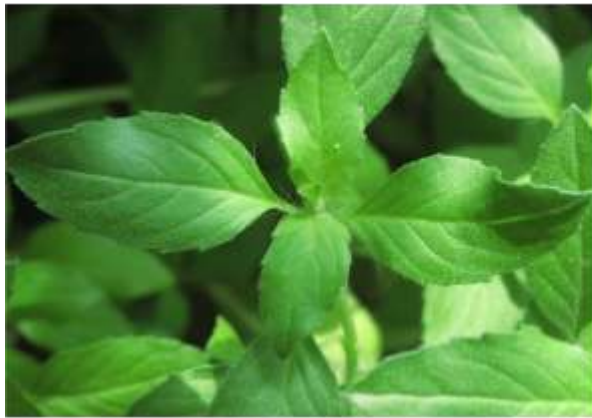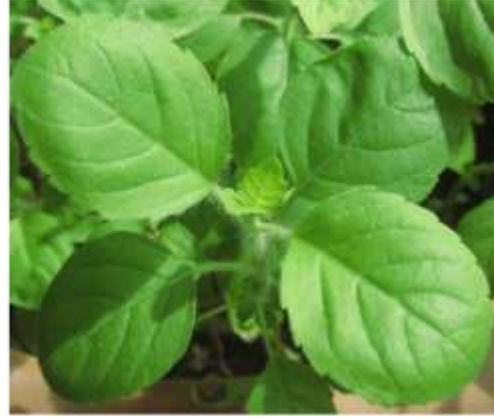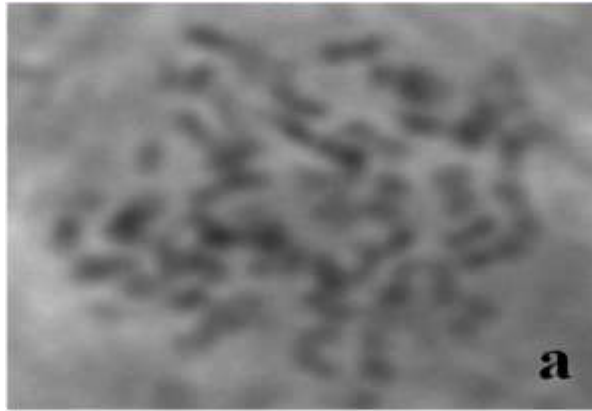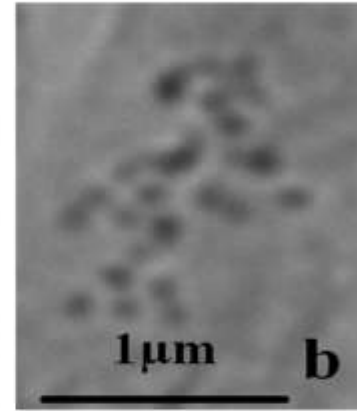

*O. basilicum*  
( $2n= 48$ )

*O. sanctum*  
( $2n= 16$ )
