# Supplementary material for: De novo sequencing and comparative analysis of holy and sweet basil transcriptomes
Source: PubMed Central journal article supplement (PMC4125705; doi:10.1186/1471-2164-15-588), 2014-07-12

**Additional file 3:** Base composition report of *O. sanctum* and *O. basilicum*.

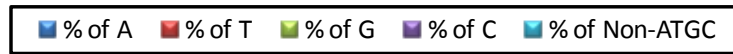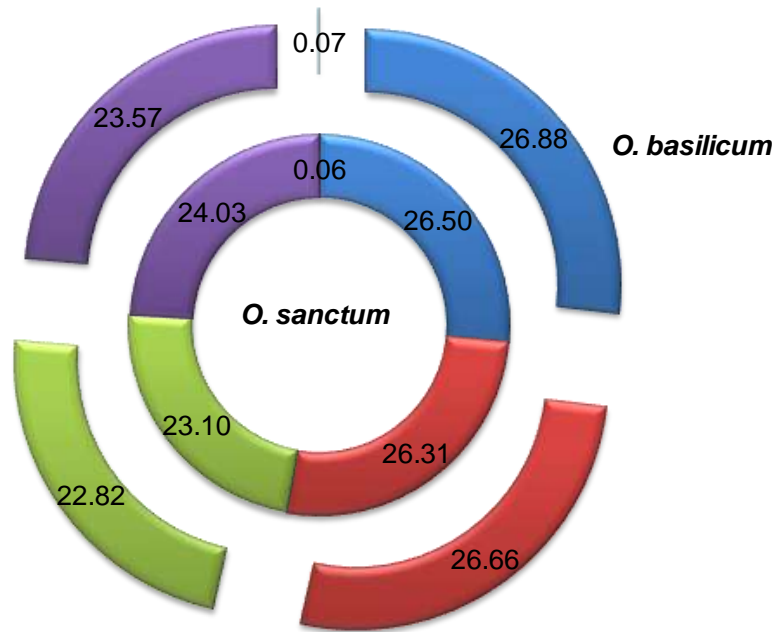

Supplement: 12864_2014_6319_MOESM7_ESM.pdf [file 12864_2014_6319_MOESM7_ESM.pdf]
